# Supplementary material for: From Risk to Value: A Systematic Review of the Value-creating Effect of Enterprise Risk Management
Source: Research Square preprint supplement (doi:10.21203/rs.3.rs-8200269/v1), 2025-12-12
Supplement: Supplementary file 1 [file 1ed523feb729b2fa8e0960a7.docx]

**Appendices**

| Table A1. Web of Science (WoS) search (31 January 2025) | | |
| --- | --- | --- |
| **Search Terms and Filters** | **Number of References** | **Comments** |
| ERM or Enterprise Risk Management or integrated risk management or enterprise-wide risk management and firm value | 39,668 | Searches title, or abstract, or author keywords |
| + English |
| + 2000-2024 |
| + Articles | 29,036 |  |
| Limited to WoS categories: Management, Economics, Business Finance | 2,871 |  |
| **Search terms in title, or abstract, or author keywords** | **2,871** |  |

| Table A2. Scopus search (31 January 2025) | | |
| --- | --- | --- |
| **Search Terms and Filters** | **Number of References** | **Comments** |
| TITLE-ABS-KEY (ERM OR "enterprise risk management" OR "integrated risk management" OR "enterprise-wide risk management" AND firm AND value) | 172 | Searches title, or abstract, or keywords |
| + English  AND LIMIT-TO (LANGUAGE, "English") |
| + 2000-2024 AND PUBYEAR > 1999 AND PUBYEAR < 2025 |
| + Articles  AND (LIMIT-TO (DOCTYPE, "ar") | 140 |  |
| Limited to subject areas: Business, Management and Accounting, Economics, Econometrics and Finance, Social Science  AND (LIMIT-TO (SUBJAREA, "BUSI") OR LIMIT-TO (SUBJAREA, "ECON") OR LIMIT-TO (SUBJAREA, "SOCI") | 129 |  |
| **Search terms in title, or abstract, or keywords** | **129** |  |

| Table A3. EBSCO Business Source Complete search (31 January 2025) | | |
| --- | --- | --- |
| **Search Terms and Filters** | **Number of References** | **Comments** |
| ERM or Enterprise Risk Management or integrated risk management or enterprise-wide risk management and firm value | 4,297 | Searches title, or abstract, or subject |
| + English |
| + 2000-2024 |
| + Articles | 1,435 |  |
| Limited to subjects: Risk Management in Business, Risk Management, Risk | 858 |  |
| **Search terms in title, or abstract, or subject** | **858** |  |

Table A4. Studies classified by research objects

| Financial institutions | Non-financial institutions | All industries | Total |
| --- | --- | --- | --- |
| 29 financial studies  (37% of total) | 21 non-financial studies  (26% of total) | 29 studies include all industries  (37% of total) | 79 |
| 1. Hoyt and Liebenberg (2011) | 1. Zou and Hassan (2015) | 1. Gordon et al. (2009) |  |
| 2. McShane et al. (2011) | 2. Florio and Leoni (2017) | 2. Laisasikorn and Rompho (2014) |  |
| 3. Lin et al. (2012) | 3. Mohd. Hafizuddin Syah Bangaan et al. (2017) | 3. Farrell and Gallagher (2015) |  |
| 4. Baxter et al. (2013) | 4. Şenol and Karaca (2017) | 4. Kommunuri et al. (2016) |  |
| 5. Eckles et al. (2014) | 5. Yang et al. (2018) | 5. Soltanizadeh et al. (2016) |  |
| 6. Rasid et al. (2014) | 6. Anton (2018) | 6. Callahan and Soileau (2017) |  |
| 7. Li et al. (2014) | 7. Zou et al. (2018) | 7. Fong-Woon and Shad (2017) |  |
| 8. Grace et al. (2015) | 8. Marc et al. (2018) | 8. Rasid et al. (2017) |  |
| 9. Hoyt and Liebenberg (2015) | 9. Annamalah et al. (2018) | 9. Lechner and Gatzert (2018) |  |
| 10. Ahmed and Manab (2016) | 10. Zou et al. (2019) | 10. Iswajuni et al. (2018) |  |
| 11. Rafidi et al. (2016) | 11. Danisman and Demirel (2019) | 11. Farrell and Gallagher (2019) |  |
| 12. Olayinka et al. (2017) | 12. González et al. (2020) | 12. Silva et al. (2019) |  |
| 13. Soliman and Mukhtar (2017) | 13. Yakob et al. (2020) | 13. Ali et al. (2019) |  |
| 14. Berry-Stölzle and Xu (2018) | 14. M. Faisal and Hasan (2020) | 14. Rehman and Anwar (2019) |  |
| 15. Ai et al. (2018) | 15. W. Khan et al. (2020) | 15. Sax and Andersen (2019) |  |
| 16. Bohnert et al. (2019) | 16. Shad et al. (2022) | 16. Malik et al. (2020) |  |
| 17. Chen et al. (2020) | 17. Rahman et al. (2022) | 17. Horvey et al. (2020) |  |
| 18. Al-Nimer et al. (2021) | 18. Hong (2023) | 18. Phan et al. (2020) |  |
| 19. Jurdi and AlGhnaimat (2021) | 19. Pan et al. (2023) | 19. Chairani and Siregar (2021) |  |
| 20. Saeidi et al. (2021) | 20. Hidayah et al. (2024) | 20. Glowka et al. (2021) |  |
| 21. Eastman and Xu (2021) | 21. Rahmawati et al. (2024) | 21. F. Faisal et al. (2021) |  |
| 22. González et al. (2022) |  | 22. Meskovic and Zaimovic (2021) |  |
| 23. Oyewo (2022) |  | 23. Ghazieh and Chebana (2021) |  |
| 24. Putri and Makaryanawati (2022) |  | 24. Hamzah et al. (2022) |  |
| 25. Tjun et al. (2022) |  | 25. Saeidi et al. (2023) |  |
| 26. González et al. (2023) |  | 26. Adenutsi and Whajah (2023) |  |
| 27. Oniovosa and Godsday (2023) |  | 27. Son et al. (2023) |  |
| 28. Tewu et al. (2024) |  | 28. A. Khan et al. (2024) |  |
| 29. Akbaş (2024) |  | 29. Resende et al. (2024) |  |
